# Supplementary material for: AI-enhanced collective intelligence
Source: PubMed Central journal article supplement (PMC11573907; doi:10.1016/j.patter.2024.101074), 2024-10-10
Supplement: mmc1.pdf [file mmc1.pdf]

**Patterns, Volume 5**

**Supplemental information**

**AI-enhanced collective intelligence**

**Hao Cui and Taha Yasseri**

| Term                                | Main concepts                                                                                                                                                                             | References |
|-------------------------------------|-------------------------------------------------------------------------------------------------------------------------------------------------------------------------------------------|------------|
| AI-enhanced Collective Intelligence | A system where artificial intelligence tools and techniques are integrated to augment the collective intelligence of a group, improving decision-making, problem-solving, and innovation. |            |
| Complex Adaptive System             | A subset of complex systems characterized by the ability of its components to adapt and learn from interactions with each other and the environment, leading to dynamic evolution.        | [60]       |
| Collective Intelligence             | The group intelligence that emerges from the collaboration and collective efforts of individuals working together towards a common goal.                                                  | [2]        |
| Complex System                      | A system composed of interconnected parts that exhibit collective behavior, self-organization, and adaptation to changing environments, often displaying emergent properties.             | [49]       |
| Complexity Theory                   | A framework for understanding how interactions among components of a system give rise to collective behaviors and emergent phenomena that cannot be predicted from individual parts.      | [49]       |
| Emergence                           | The process through which larger patterns, structures, or behaviors arise from the interactions among smaller or simpler entities that do not exhibit such properties individually.       | [60]       |
| Hybrid Intelligence                 | The combination of human intelligence and artificial intelligence, leveraging the strengths of both to solve complex problems more effectively.                                           | [34]       |
| Multilayer Network                  | A network model where nodes represent entities and different layers represent different types of interactions or relationships between these entities.                                    | [56]       |
| Wisdom of Crowds                    | The collective opinion of a diverse and independent group of individuals can be more accurate than that of a single expert, leveraging diversity of thought and decentralization.         | [10]       |

Table S1: Main concepts of key terms in human-AI collective intelligence. For references, see the main article.
