# Supplementary material for: AI-enhanced collective intelligence
Source: PubMed Central journal article supplement (PMC11573907; doi:10.1016/j.patter.2024.101074), 2024-10-10
Supplement: mmc2.pdf [file mmc2.pdf]

| Application            | Area                                                 | Aspects of Collective Intelligence                                                                                                           | Aspects of Artificial Intelligence                                                                                                              |
|------------------------|------------------------------------------------------|----------------------------------------------------------------------------------------------------------------------------------------------|-------------------------------------------------------------------------------------------------------------------------------------------------|
| Safecity               | Public sector, NGO                                   | <ul style="list-style-type: none"> <li>• Crowdsourced reporting</li> <li>• Community discussion and initiatives</li> </ul>                   | <ul style="list-style-type: none"> <li>• Predictive analytics</li> <li>• Sentiment analysis</li> </ul>                                          |
| Ushahidi               | Public sector, NGO                                   | <ul style="list-style-type: none"> <li>• Crowdsourced crisis information</li> <li>• Community reporting</li> </ul>                           | <ul style="list-style-type: none"> <li>• Machine learning</li> <li>• Natural language processing</li> </ul>                                     |
| Bluenove               | High Tech (software)                                 | <ul style="list-style-type: none"> <li>• Open consultation</li> <li>• Collaborative ideation</li> </ul>                                      | <ul style="list-style-type: none"> <li>• Natural Language Processing</li> <li>• Emotion analysis</li> </ul>                                     |
| Figure Eight           | High Tech (software)                                 | <ul style="list-style-type: none"> <li>• Crowdsourced annotation</li> </ul>                                                                  | <ul style="list-style-type: none"> <li>• Machine learning</li> <li>• Automated Workflows</li> </ul>                                             |
| Civil War Photo Sleuth | Media, telecommunication, entertainment, hospitality | <ul style="list-style-type: none"> <li>• Crowdsourced Identification</li> <li>• Collaborative research</li> </ul>                            | <ul style="list-style-type: none"> <li>• Facial recognition</li> <li>• Image analysis</li> </ul>                                                |
| Bellingcat             | Media, telecommunication, entertainment, hospitality | <ul style="list-style-type: none"> <li>• Crowdsourced investigation</li> <li>• Community collaboration</li> </ul>                            | <ul style="list-style-type: none"> <li>• Multi-modal data analysis</li> <li>• Pattern recognition</li> </ul>                                    |
| Litterati              | Energy, natural resources                            | <ul style="list-style-type: none"> <li>• Crowdsourced litter data</li> <li>• Community engagement</li> </ul>                                 | <ul style="list-style-type: none"> <li>• Computer vision</li> <li>• Predictive modeling</li> </ul>                                              |
| eBird                  | Energy, natural resources                            | <ul style="list-style-type: none"> <li>• Crowdsourced bird observations</li> <li>• Peer review and validation</li> </ul>                     | <ul style="list-style-type: none"> <li>• Computer vision</li> <li>• Predictive modeling</li> </ul>                                              |
| Kialo Edu              | Education and academia                               | <ul style="list-style-type: none"> <li>• Structured debates and discussions</li> </ul>                                                       | <ul style="list-style-type: none"> <li>• Natural language processing</li> <li>• Sentiment analysis</li> <li>• content recommendation</li> </ul> |
| Zooniverse             | Education and academia                               | <ul style="list-style-type: none"> <li>• Crowdsourced research</li> <li>• Collaborative data analysis</li> </ul>                             | <ul style="list-style-type: none"> <li>• Machine learning classification</li> <li>• Pattern recognition</li> </ul>                              |
| Human Dx               | Healthcare                                           | <ul style="list-style-type: none"> <li>• Crowdsourced medical expertise</li> <li>• Collaborative problem-solving</li> </ul>                  | <ul style="list-style-type: none"> <li>• Pattern recognition</li> <li>• Data analytics</li> </ul>                                               |
| CrowdEEG               | Healthcare                                           | <ul style="list-style-type: none"> <li>• Collaborative annotation</li> </ul>                                                                 | <ul style="list-style-type: none"> <li>• Machine learning training</li> <li>• Predictive modeling</li> </ul>                                    |
| Numerai                | Financial services                                   | <ul style="list-style-type: none"> <li>• Crowdsourced predictions</li> <li>• Community collaboration</li> </ul>                              | <ul style="list-style-type: none"> <li>• Ensemble Learning</li> <li>• Predictive Analytics</li> </ul>                                           |
| CryptoSwarm AI         | Financial services                                   | <ul style="list-style-type: none"> <li>• Crowdsourced market insights</li> <li>• Swarm intelligence</li> <li>• Community feedback</li> </ul> | <ul style="list-style-type: none"> <li>• Swarm AI</li> <li>• Predictive modeling</li> <li>• Automated alerts</li> </ul>                         |

|                     |                           |                                                                                                                                             |                                                                                                                                                                                       |
|---------------------|---------------------------|---------------------------------------------------------------------------------------------------------------------------------------------|---------------------------------------------------------------------------------------------------------------------------------------------------------------------------------------|
| MarineTraffic       | Supply Chain, Real Estate | <ul style="list-style-type: none"> <li>• Crowdsourced Vessel Tracking</li> <li>• Community Contributions</li> <li>• Data Sharing</li> </ul> | <ul style="list-style-type: none"> <li>• Automatic Identification System (AIS) Data Analysis</li> <li>• Object detection</li> <li>• Predictive Analytics</li> </ul>                   |
| Waze                | Supply Chain, Real Estate | <ul style="list-style-type: none"> <li>• Crowdsourced Traffic Data</li> <li>• Community Editing and feedback</li> </ul>                     | <ul style="list-style-type: none"> <li>• Route Optimization</li> <li>• Personalized Recommendations</li> <li>• Voice assistant integration</li> <li>• Predictive Analytics</li> </ul> |
| WeFarm              | Agriculture               | <ul style="list-style-type: none"> <li>• Crowdsourcing advice</li> <li>• Knowledge sharing</li> <li>• Problem-solving</li> </ul>            | <ul style="list-style-type: none"> <li>• Automated matching</li> <li>• Personalized recommendations</li> <li>• Natural language processing</li> </ul>                                 |
| Mercy Corps AgriFin | Agriculture               | <ul style="list-style-type: none"> <li>• Community-driven peer learning</li> <li>• Knowledge sharing</li> </ul>                             | <ul style="list-style-type: none"> <li>• AI imagery</li> <li>• Data analytics and modeling</li> <li>• Recommendation algorithm</li> </ul>                                             |

Table S2: Summary of CI and AI aspects of various application examples.
